# Supplementary material
Source: Springer Nature journal article supplement (https://www.springermedizin.de/resource/supplementary/12919_2011_40_MOESM3_ESM.pdf/9654334)
Supplement: MOESM3 [file 9654334]

### Additional file 3 — Accuracy of short segments of HVR

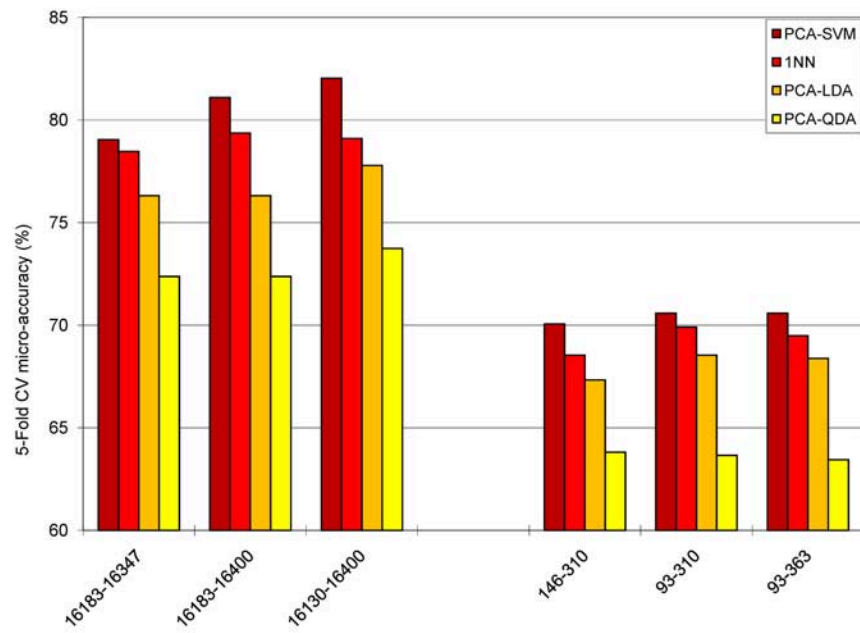

Comparison of PCA-QDA, PCA-LDA, 1NN, and PCA-SVM 5-fold CV micro-accuracy on 6 selected windows of 165-271bp spanning the most informative regions of HVR1 and HVR2.
